# Supplementary material for: Notch signaling promotes a HIF2α-driven hypoxic response in multiple tumor cell types
Source: PubMed Central journal article supplement (PMC6237764; doi:10.1038/s41388-018-0400-3), 2018-07-11

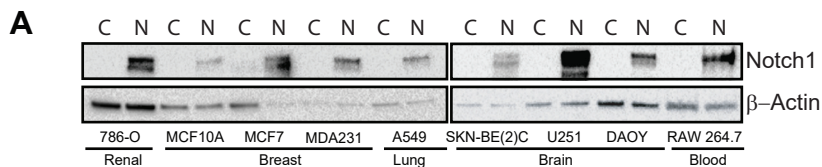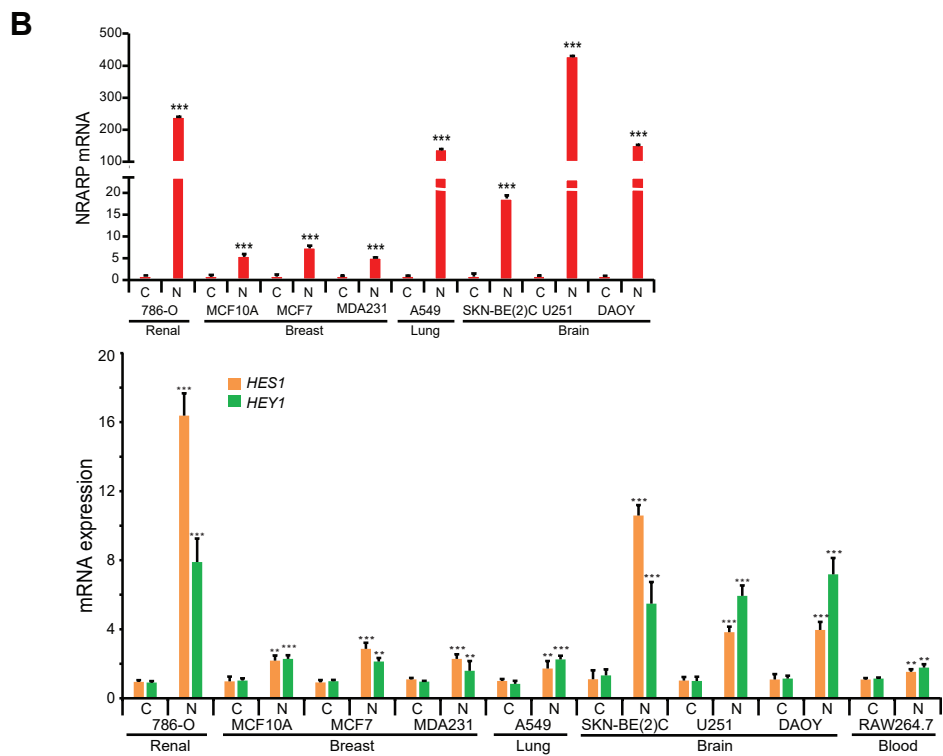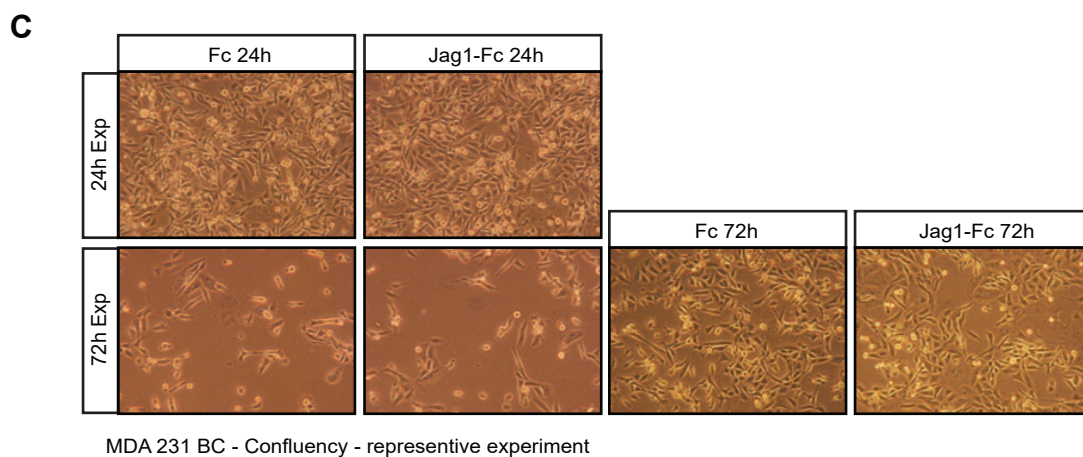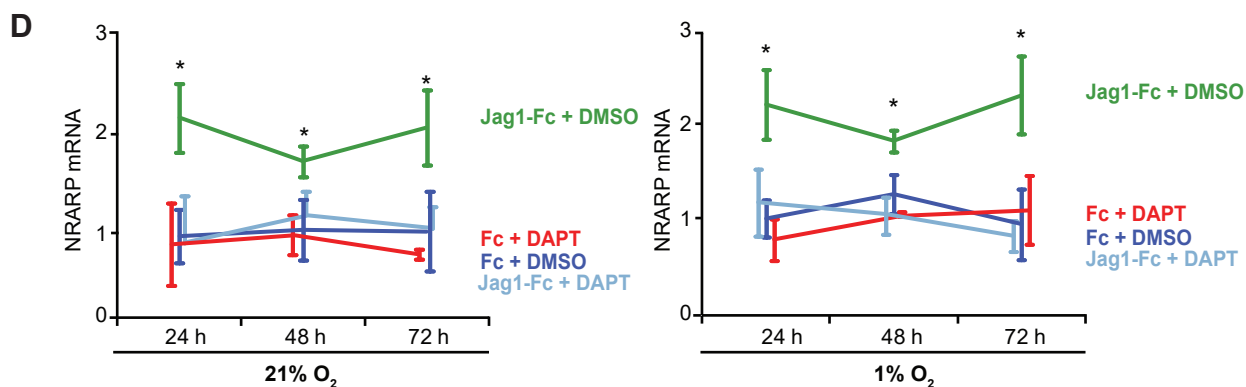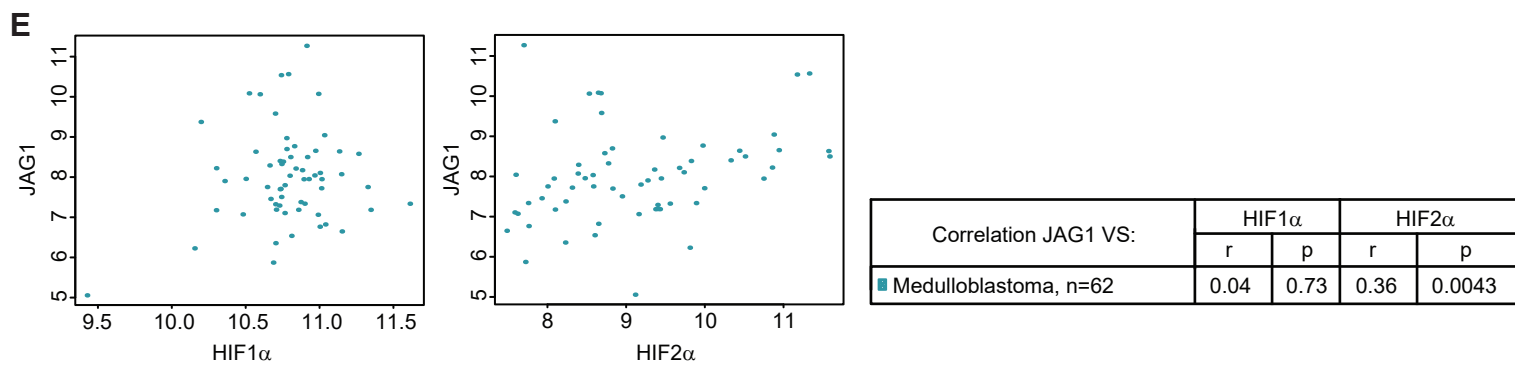

Supplement: 41388_2018_400_MOESM2_ESM.pdf [file 41388_2018_400_MOESM2_ESM.pdf]
