# Supplementary material for: Notch signaling promotes a HIF2α-driven hypoxic response in multiple tumor cell types
Source: PubMed Central journal article supplement (PMC6237764; doi:10.1038/s41388-018-0400-3), 2018-07-11
Supplement: 41388_2018_400_MOESM3_ESM.pdf [file 41388_2018_400_MOESM3_ESM.pdf]

**A**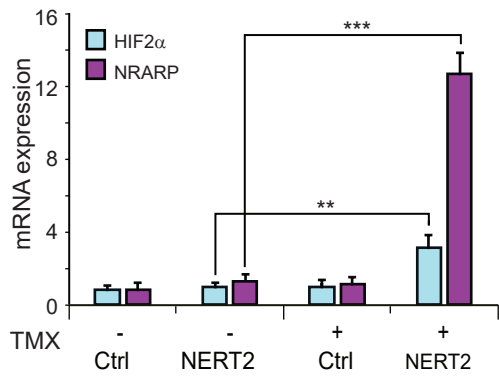**B**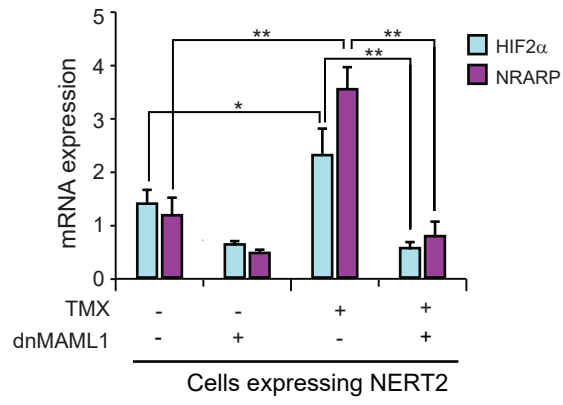**C**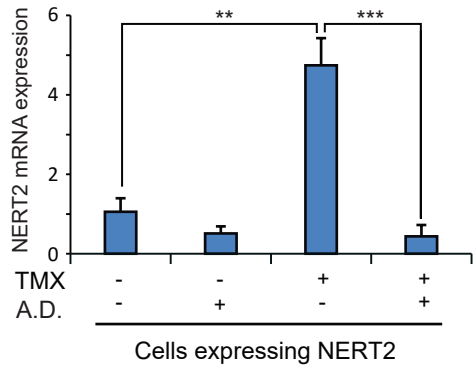**D**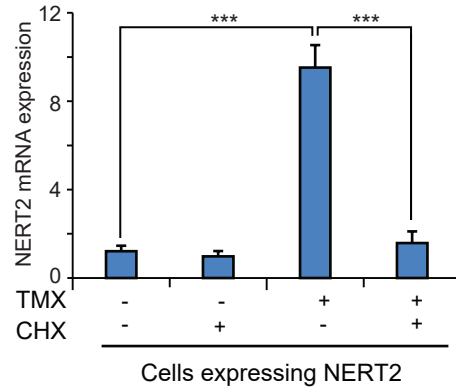**E**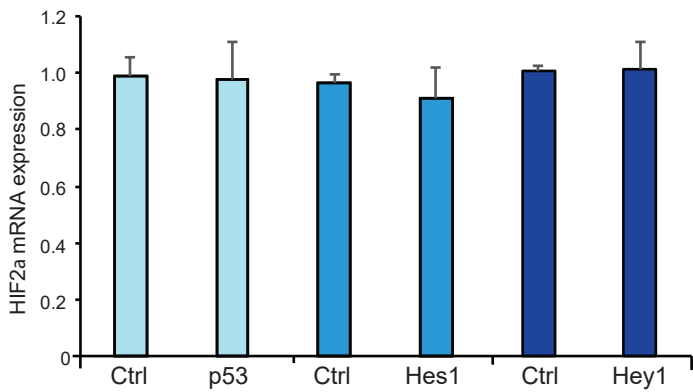

Sup. Figure 2
