# Supplementary material for: Notch signaling promotes a HIF2α-driven hypoxic response in multiple tumor cell types
Source: PubMed Central journal article supplement (PMC6237764; doi:10.1038/s41388-018-0400-3), 2018-07-11
Supplement: 41388_2018_400_MOESM6_ESM.pdf [file 41388_2018_400_MOESM6_ESM.pdf]

| Human primers |                          |                          |
|---------------|--------------------------|--------------------------|
| HIF1alpha     | TTCCAGTTACGTTCCCTTCGATCA | TTTGAGGACTTGCGCTTCA      |
| HIF2alpha     | TGCTCCCACGGCCTGTAC       | TTGTCACACCTATGGCATATCACA |
| ID3           | GAGCTTGCTGGACGACATGAA    | ATGACGCGCTGTAGGATTTCC    |
| TGFB2         | GTCAGGCCATATCCATCAAGGA   | GCAGTCAAGCTGGATGGAAACT   |
| NOTCH3        | AGTTACCCCCAAGAGGCAAGT    | TATCTCGGTCACGCTGCAA      |
| CPE           | CAGTACCCGCATTACATCATG    | TGCTTCGACCCACAAACCA      |
| b-actin       | CCAGAGGCGTACAGGGATAG     | CCAACCGCGAGAAGATGA       |
| NRARP         | TTCTCCCTCTCCCTCAAATCC    | AACTGCAAAACAAGCCGGTT     |
| 18S           | AGAGGTGAAATTCCTGGACCGG   | ATCGTCTTCGAACCTCCGACTT   |
| WISP1         | TGCTGTAAGATGTGCGCTCAG    | ACACTCCTATTGCGTACCTCG    |
| HCLS1         | AGTGGGCCATGATGTGTCTG     | CTCCCATCGTTGCTCCTTT      |
| EEF1A2        | GAAGACCCACATCAACATCGT    | CTCCGCATTTGTAGATGAGGTG   |
| ITGBL1        | AGACCTACGACGGGAGCAC      | ACCTGCATTAGAGCAGATGATGT  |
| GDA           | GCTGGAAGTAGCATAGACCTGC   | TCTTCTGCAAAGTCGATGTTCTG  |
| ITGB4         | GCAGCTTCCAAATCACAGAGG    | CCAGATCATCGGACATGGAGTT   |
| DNER          | AAGGCTATGAAGGTCCCAACT    | CTGAGAGCGAGGCAGGATTT     |
| PID1          | TCCTGGAATCCGGCCATTC      | AGGTCATCATTGATCTCCCTGT   |
| NERT          | TGCCTGGCTAGAGATBCCTGATG  | TTCCCTGGTTCCTGTCCAAG     |
| HES1          | TCGTTCATGCACTCGCTGA      | AGGCGGACATTCTGGAAATG     |
| HEY1          | AAAAAGCCGAGATCCTGCAGA    | CCGAAATCCCAAACCTCCGATA   |
| CHIP          | AGCAGGGCAATCGTCTGTTC     | CAAGGCCCGGTTGGTGTAAATA   |
| HES4          | CGCTCAGCTCAAACCCCTCAT    | AGGTGTCTCACGGTCATCTCCA   |
|               |                          |                          |
| Mouse Primers |                          |                          |
| HIF1alpha     | GAATGCTCAGAGGAAGCGAAA    | ACAGTCACCTGGTTGCTGCA     |
| HIF2alpha     | CCAACCTCTTTGCTCCGGTTTT   | GGCATTACCAGACAGCTTCGA    |
| Hes1          | AGAGGCTGCCAAGGTTTTTG     | ACTGGAAGGTGACACTGCGTT    |
| Hey1          | CTTGAGTTCGGCGCTGTGTTCC   | GATGCCCTCCGTCTTTTCCT     |
| GAPDH         | AGGAGCGAGACCCCACTAACAT   | GTGAAGACACCAGTAGACTCCACG |

Sup. Figure 5
