# Supplementary material for: Notch signaling promotes a HIF2α-driven hypoxic response in multiple tumor cell types
Source: PubMed Central journal article supplement (PMC6237764; doi:10.1038/s41388-018-0400-3), 2018-07-11
Supplement: 41388_2018_400_MOESM7_ESM.pdf [file 41388_2018_400_MOESM7_ESM.pdf]

| BP_FAT GO Term                                        | Genes (n) | P-value  | Benjamini |
|-------------------------------------------------------|-----------|----------|-----------|
| cell surface receptor linked signal transduction      | 35        | 1,50E-03 | 1,30E-01  |
| regulation of cell proliferation                      | 25        | 4,50E-06 | 3,40E-03  |
| cell adhesion                                         | 17        | 4,20E-03 | 2,50E-01  |
| biological adhesion                                   | 17        | 4,20E-03 | 2,40E-01  |
| positive regulation of cell proliferation             | 15        | 1,80E-04 | 3,90E-02  |
| behavior                                              | 14        | 1,90E-03 | 1,50E-01  |
| response to organic substance                         | 13        | 9,70E-02 | 8,30E-01  |
| blood vessel development                              | 12        | 7,90E-05 | 3,00E-02  |
| vasculature development                               | 12        | 9,80E-05 | 3,00E-02  |
| positive regulation of signal transduction            | 12        | 4,00E-04 | 6,60E-02  |
| positive regulation of cell communication             | 12        | 9,80E-04 | 1,10E-01  |
| negative regulation of cell proliferation             | 12        | 2,10E-03 | 1,50E-01  |
| regulation of phosphorylation                         | 12        | 1,30E-02 | 4,70E-01  |
| cell motion                                           | 12        | 1,50E-02 | 5,00E-01  |
| regulation of phosphate metabolic process             | 12        | 1,80E-02 | 5,10E-01  |
| regulation of phosphorus metabolic process            | 12        | 1,80E-02 | 5,10E-01  |
| vesicle-mediated transport                            | 12        | 5,10E-02 | 7,20E-01  |
| regulation of cell adhesion                           | 11        | 2,50E-06 | 3,90E-03  |
| blood vessel morphogenesis                            | 11        | 1,10E-04 | 2,70E-02  |
| cell morphogenesis                                    | 10        | 1,60E-02 | 5,00E-01  |
| cellular component morphogenesis                      | 10        | 3,00E-02 | 6,10E-01  |
| neuron differentiation                                | 10        | 5,10E-02 | 7,20E-01  |
| locomotory behavior                                   | 9         | 1,10E-02 | 4,20E-01  |
| skeletal system development                           | 9         | 2,40E-02 | 5,70E-01  |
| chordate embryonic development                        | 9         | 2,90E-02 | 6,20E-01  |
| embryonic development ending in birth or egg hatching | 9         | 3,00E-02 | 6,10E-01  |
| cell projection organization                          | 9         | 4,90E-02 | 7,20E-01  |
| Wnt receptor signaling pathway                        | 8         | 6,40E-04 | 8,60E-02  |
| angiogenesis                                          | 8         | 1,20E-03 | 1,20E-01  |
| taxis                                                 | 8         | 1,90E-03 | 1,60E-01  |
| chemotaxis                                            | 8         | 1,90E-03 | 1,60E-01  |
| regulation of cell migration                          | 8         | 2,60E-03 | 1,70E-01  |
| regulation of locomotion                              | 8         | 5,20E-03 | 2,70E-01  |
| regulation of cell motion                             | 8         | 5,30E-03 | 2,70E-01  |
| cell migration                                        | 8         | 3,20E-02 | 6,10E-01  |
| cell motility                                         | 8         | 5,20E-02 | 7,20E-01  |
| localization of cell                                  | 8         | 5,20E-02 | 7,20E-01  |
| negative regulation of molecular function             | 8         | 7,40E-02 | 8,00E-01  |
| enzyme linked receptor protein signaling pathway      | 8         | 8,20E-02 | 8,20E-01  |

Sup. Table 1
